# Supplementary material for: Low frequency nanobubble-enhanced ultrasound mechanotherapy for noninvasive cancer surgery
Source: Royal Society of Chemistry journal article supplement (doi:10.1039/d2nr01367c), 2022-01-01
Supplement: d2nr01367c1.pdf [file d2nr01367c1.pdf]

## Supplementary Information

### Low frequency nanobubble-enhanced ultrasound mechanotherapy for noninvasive cancer surgery

Mike Bismuth<sup>1</sup>, Sharon Katz<sup>1,2</sup>, Tamar Mano<sup>1</sup>, Ramona Aronovich<sup>1</sup>, Dov Hershkovitz<sup>3</sup>, Agata A. Exner<sup>4</sup>, and Tali Ilovitsh<sup>1,2\*</sup>

<sup>1</sup> Department of Biomedical Engineering, Tel Aviv University, Tel Aviv 6997801, Israel

<sup>2</sup> The Sagol School of Neuroscience, Tel Aviv University, Tel Aviv 6997801, Israel

<sup>3</sup> Department of Pathology, Tel-Aviv Sourasky Medical Center, Sackler Faculty of Medicine, Tel-Aviv University, Tel Aviv 6997800, Israel

<sup>4</sup> Departments of Radiology and Biomedical Engineering, Case Western Reserve University, Cleveland, OH, USA

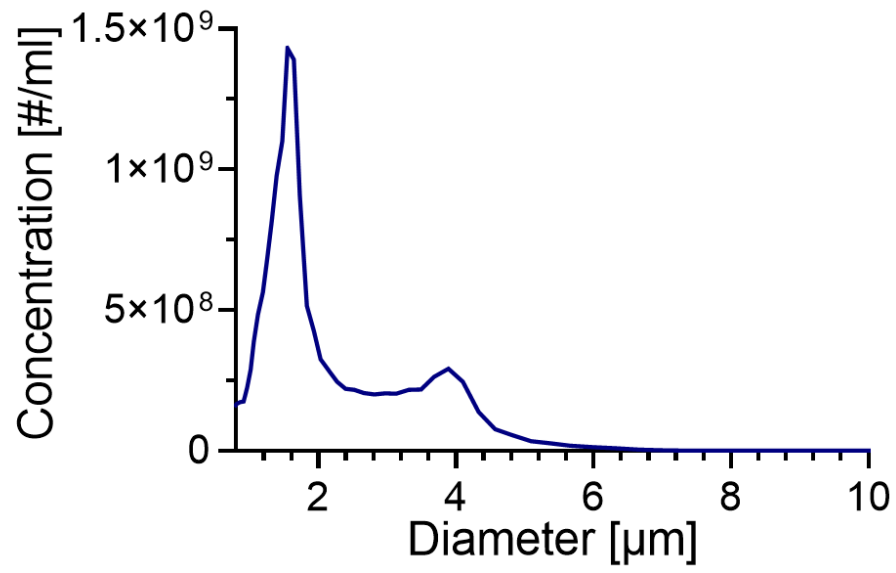

**Fig. S1 Microbubble characterization.** Microbubble size distribution and particle concentration.

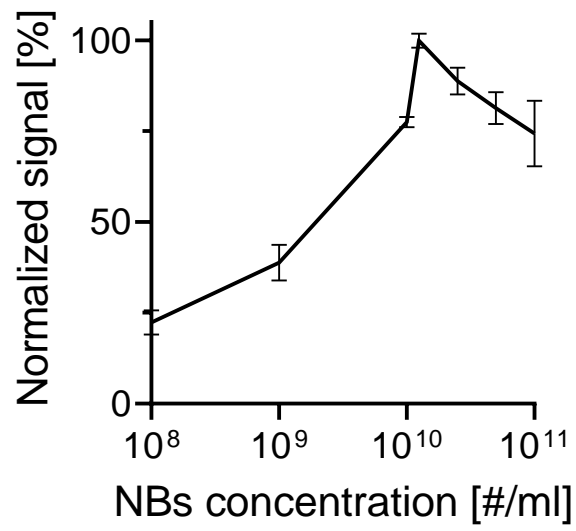

**Fig. S2 Nanobubble concentration optimization for the mimicking phantom experiments.** Inclusion signal as a function of NB concentration.

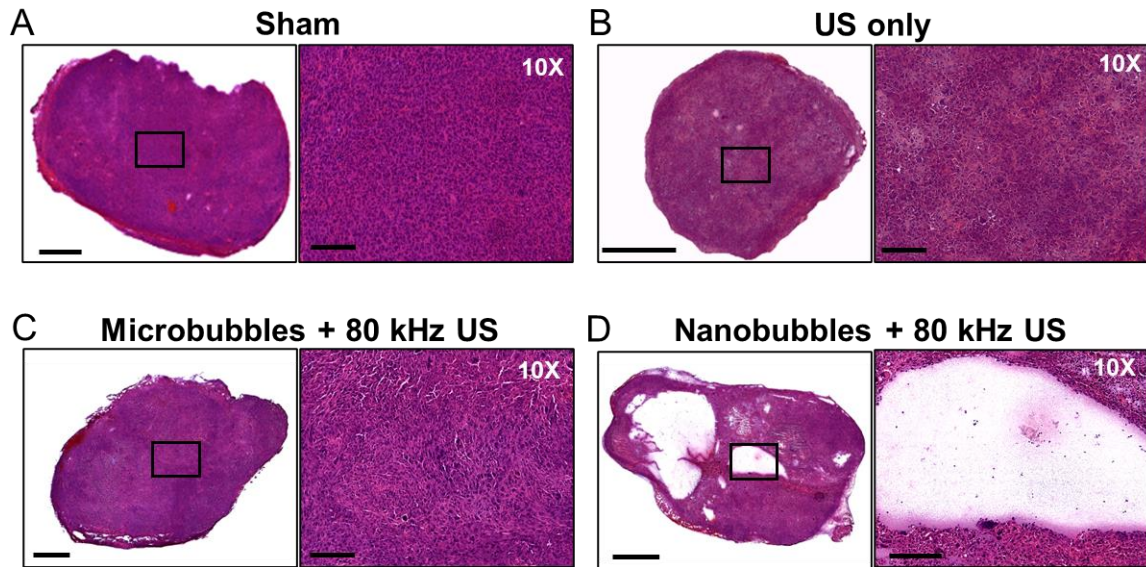

**Fig. S3 Histological photomicrographs of control and treated groups.** (A) Sham tumor, (B) Tumor treated with low frequency ultrasound (US) only, (C) Tumor treated with low frequency US 10 min after systemic injection of microbubbles and (D) Tumor treated with low frequency US 10 min after systemic injection of nanobubbles. Scale bars are 1 mm for tumor cross- sections and 200  $\mu\text{m}$  for 10x magnified images.
